# Supplementary material for: Identification of c-di-GMP Signaling Components in Xanthomonas oryzae and Their Orthologs in Xanthomonads Involved in Regulation of Bacterial Virulence Expression
Source: PubMed Central journal article supplement (PMC6637768; doi:10.3389/fmicb.2019.01402), 2019-07-11
Supplement: Presentation_1.pdf [file Presentation_1.pdf]

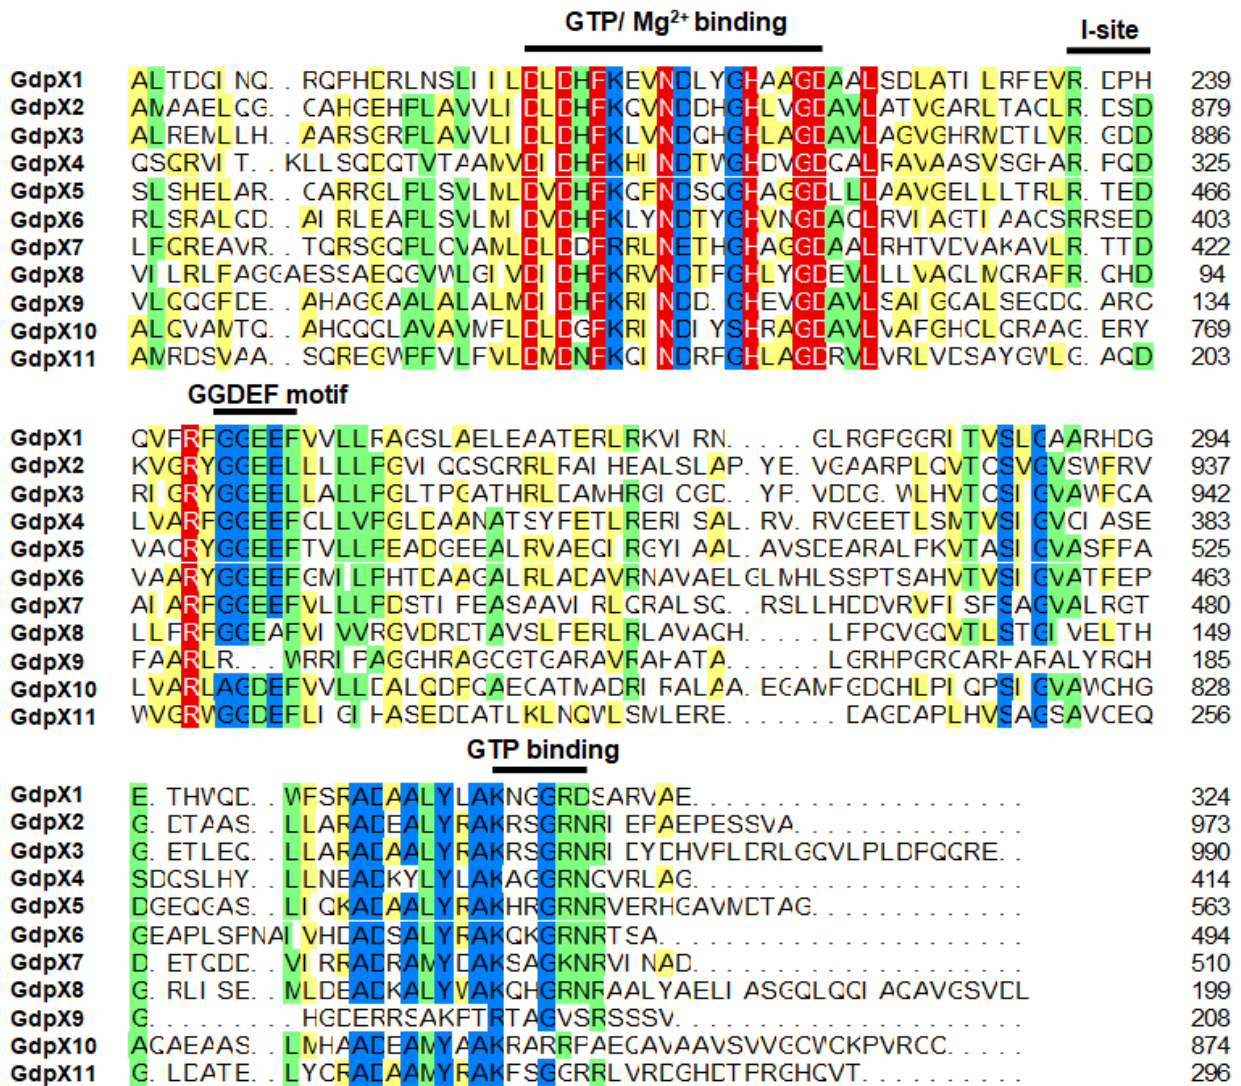

**Fig. S1 Sequence alignment of the GGDEF standalone proteins GdpXs**

Multiple sequence alignments were carried out by using DNAMAN software (version 6.0, Lynnon BioSoft, Canada). The amino acids highlighted with red, blue, green, and yellow mean 100%, ≥75%, ≥50% and ≥33% identities, respectively. Black lines showed the corresponding sites of GTP/Mg<sup>2+</sup> binding, I-site, GGDEF motif and GTP binding sites, respectively.

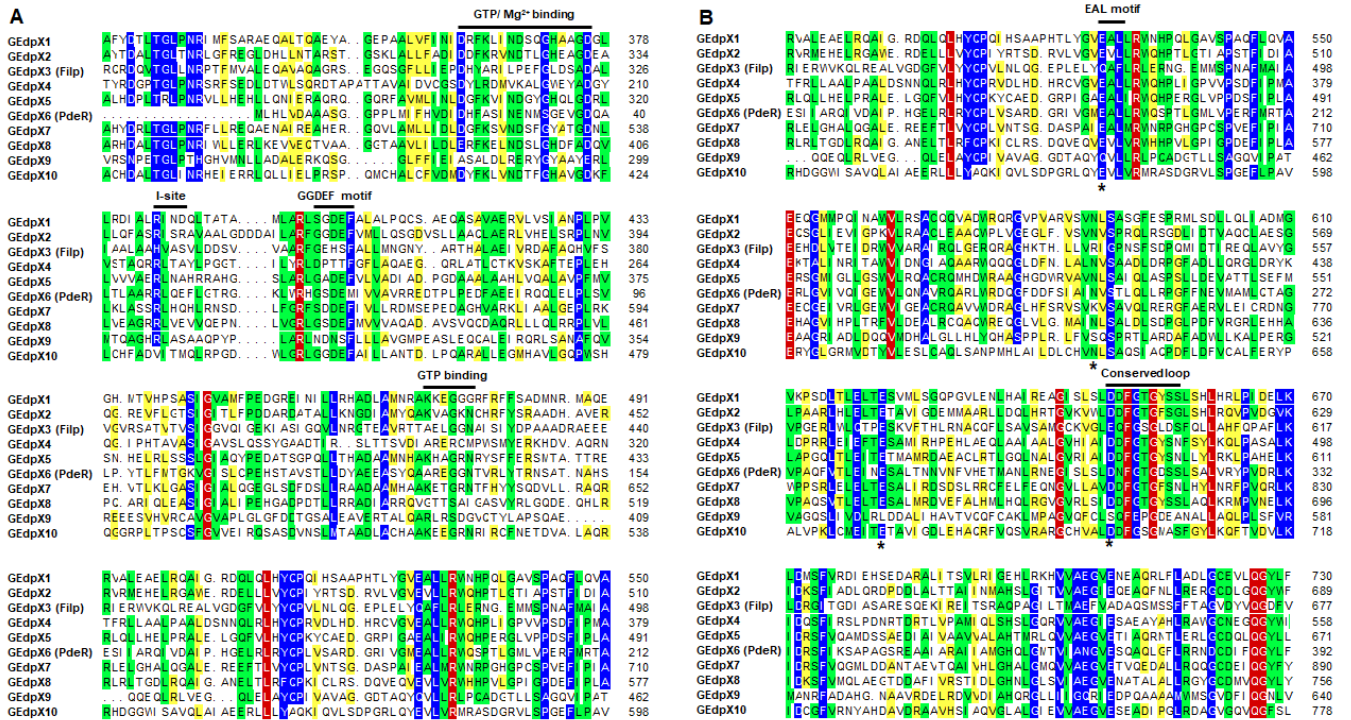

**Fig. S2 Sequence alignment of the GGDEF and EAL hybrid proteins GEdpXs**

Multiple sequence alignments were carried out by using DNAMAN software (version 6.0, Lynnon BioSoft, Canada). The amino acids highlighted with red, blue, green, and yellow mean 100%, ≥75%, ≥50% and ≥33% identities, respectively. **(A) The alignment of GGDEF domain.** Black lines showed the corresponding sites of GTP/Mg<sup>2+</sup> binding, I-site, GGDEF motif, and GTP binding sites, respectively. **(B) The alignment of EAL domain.** Asterisks showed the critical metal cation and substrate binding sites. Black lines showed EAL and Loop 6 residues, respectively.





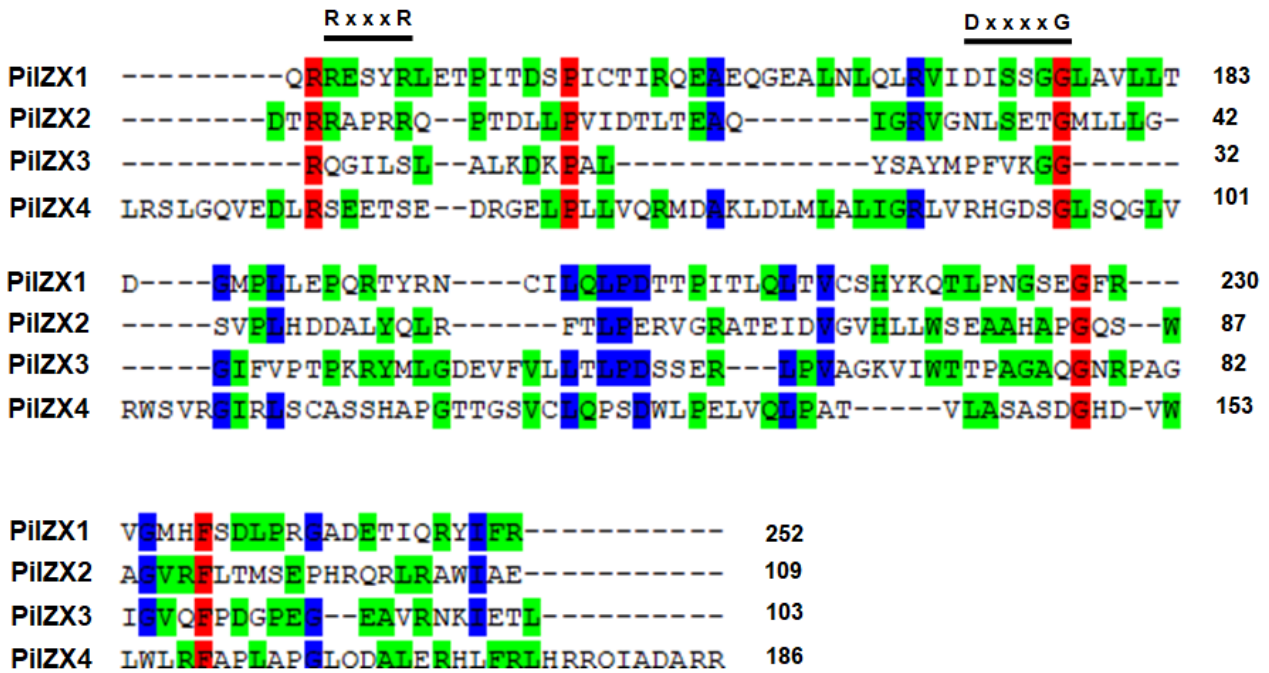

**Fig. S5 Sequence alignment of the PilZ domain proteins PilZXs**

Multiple sequence alignments were carried out by MEGA Muscle software analysis (version 7.0.21) and edited by using Genedoc software. The amino acids highlighted with red, blue, and green mean 100%, 75%, and 50% identities, respectively. Black lines showed the conserved motifs that were involved in c-di-GMP binding in the PilZ domain.
